# Supplementary material for: Parallel evolution in the emergence of highly pathogenic avian influenza A viruses
Source: PubMed Central journal article supplement (PMC7608645; doi:10.1038/s41467-020-19364-x), 2020-11-02
Supplement: 41467_2020_19364_MOESM3_ESM.pdf [file 41467_2020_19364_MOESM3_ESM.pdf]

## **Description of Additional Supplementary Files**

Supplementary Data 1.

Description: Accession numbers for reduced datasets

H5\_H7\_ACCESSIONS.xls

Supplementary Data 2.

Description: ML trees for the reconstructions of ancestral states

RASML\_H5\_H7.pdf

Supplementary Data 3.

Description: HA large-scale phylogenetic trees coloured according to amino acid states/ phenotype.

LARGE\_SCALE\_H5\_H7.pdf

Supplementary Data 4.

Description: Likelihood Ratio Tests and PSS scored under BST

H5\_H7\_LRT\_PSS\_CODEML.xls
